# Supplementary material for: Inferring tumor progression in large datasets
Source: PubMed Central journal article supplement (PMC7577444; doi:10.1371/journal.pcbi.1008183), 2020-10-09
Supplement: pcbi.1008183.s001.pdf [file pcbi.1008183.s001.pdf]

## Likelihood calculation details

We want to calculate  $p(Y|\mathcal{P}, \sigma_{1:M}, \epsilon, \delta)$ , where  $Y = \{Y_m : m \in \{1, \dots, M\}\}$  is our observation matrix,  $\sigma_{1:M} = (\sigma_1, \dots, \sigma_M)$  is the given vector of progression stages of the tumors, and  $\mathcal{P} = (D_1, D_2, \dots, D_L, P)$  is our pathway progression model. Since the tumors are independent given  $\mathcal{P}$  and  $\sigma_{1:M}$ ,

$$p(Y|\mathcal{P}, \sigma_{1:M}, \epsilon, \delta) = \prod_{m=1}^M p(Y_m|\mathcal{P}, \sigma_m, \epsilon, \delta).$$

We separate the bits corresponding to different pathways as:

$$p(Y_m|\mathcal{P}, \sigma_m, \epsilon, \delta) = p(Y_{m,P}|\mathcal{P}, \sigma_m, \epsilon, \delta) \prod_{l=1}^L p(Y_{m,D_l}|\mathcal{P}, \sigma_m, \epsilon, \delta) \quad (1)$$

In order to calculate each term of form  $p(Y_{m,S}|\mathcal{P}, \sigma_m, \epsilon, \delta)$  in (1), we marginalize over all possible noise-free vectors  $Y_{m,S}^*$ :

$$p(Y_{m,S}|\mathcal{P}, \sigma_m, \epsilon, \delta) = \sum_{Y_{m,S}^*} p(Y_{m,S}^*|\mathcal{P}, \sigma_m) p(Y_{m,S}|Y_{m,S}^*, \epsilon, \delta) \quad (2)$$

If  $S \in \{D_1, \dots, D_{\sigma_m}\}$ ,  $Y_{m,S}^*$  has to be a one-hot binary vector of length  $|S|$ . Denoting the number of ones in the observed  $Y_{m,S}$  by  $r$ , we have:

$$p(Y_{m,S}|\mathcal{P}, \sigma_m, \epsilon, \delta) = \frac{r}{|S|} (1 - \delta) \epsilon^{r-1} (1 - \epsilon)^{|S|-r} + \frac{|S| - r}{|S|} \delta \epsilon^r (1 - \epsilon)^{|S|-r-1}. \quad (3)$$

The first summand in this expression corresponds to the probability of the 1 in the latent  $Y_{m,S}^*$  being among our  $r$  observed 1's in  $Y_{m,S}$  (which is the case with probability of  $r/|S|$ ), times the probability of getting to  $Y_{m,S}$  from such a  $Y_{m,S}^*$ . In this case,  $Y_{m,S}$  is obtained by the 1 in  $Y_{m,S}^*$  being kept from flip-back, followed by passenger mutations in  $r - 1$  genes (leading to the total of  $r$  observed mutations) and no false positives in the remaining  $|S| - r$  genes. Similarly, the second summand in (3) corresponds to the probability of the 1 in the latent  $Y_{m,S}^*$  being among our  $|S| - r$  observed 0's in  $Y_{m,S}$  (due to a flip-back). This is the case with probability of  $(|S| - r)/|S|$ , and if it is, then  $Y_{m,S}$  is obtained by a flip-back, followed by passenger mutations in  $r$  genes and no false positives in the remaining  $|S| - r - 1$  genes.

If  $S \in \{D_{\sigma_m+1}, \dots, D_L\}, P$ ,  $Y_{m,S}^*$  has to be a vector of  $|S|$  zeros. Hence, observing  $r$  ones in  $Y_{m,S}$ , we have exactly  $r$  false positives, leading to:

$$p(Y_{m,S}|\mathcal{P}, \sigma_m, \epsilon, \delta) = \epsilon^r (1 - \epsilon)^{|S|-r}. \quad (4)$$

---

**Algorithm S1.** Fast calculation of the likelihood  $p(Y|\mathcal{P}, \alpha, \epsilon, \delta)$ 


---

```

1: Initialize  $\mathcal{A}$  and  $\mathcal{B}$  to be zero matrices of shape  $(z, z)$ , where  $z = \max_{l \in [L]} |D_l|$ 
2: for all  $m \in \{1, \dots, M\}$  do ▷ Calculate  $p(Y_m|\mathcal{P}, \alpha, \epsilon, \delta)$ 
3:   for  $\sigma_m \in \{1, \dots, L\}$  do ▷ Calculate  $p(Y_m, \sigma_m|\mathcal{P}, \alpha, \epsilon, \delta)$ 
4:      $R \leftarrow 1$ 
5:     for  $S \in \{D_1, \dots, D_L, P\}$  do
6:        $r = \|Y_{m,S}\|_1$ 
7:       if  $S \in \{D_1, \dots, D_{\sigma_m}\}$  then
8:         if  $\mathcal{A}[|S|, r] == 0$  then
9:            $A = \frac{r}{|S|}(1 - \delta)\epsilon^{r-1}(1 - \epsilon)^{|S|-r} + \frac{|S|-r}{|S|}\delta\epsilon^r(1 - \epsilon)^{|S|-r-1}$ 
10:           $\mathcal{A}[|S|, r] \leftarrow A$ 
11:         else
12:            $A = \mathcal{A}[|S|, r]$ 
13:         else
14:           if  $\mathcal{B}[|S|, r] == 0$  then
15:              $A = \epsilon^r(1 - \epsilon)^{|S|-r}$ 
16:              $\mathcal{B}[|S|, r] \leftarrow A$ 
17:           else
18:              $A = \mathcal{B}[|S|, r]$ 
19:            $R \leftarrow R * A$ 
20:            $p(Y_m|\mathcal{P}, \sigma_m, \epsilon, \delta) = R$ 
21:            $p(Y_m, \sigma_m|\mathcal{P}, \alpha, \epsilon, \delta) = p(\sigma_m|\alpha)p(Y_m|\mathcal{P}, \sigma_m, \epsilon, \delta)$ 
22:            $p(Y_m|\mathcal{P}, \alpha, \epsilon, \delta) = \sum_{\sigma_m=1}^L p(Y_m, \sigma_m|\mathcal{P}, \alpha, \epsilon, \delta)$ 
23:  $p(Y|\mathcal{P}, \alpha, \epsilon, \delta) = \prod_{m=1}^M p(Y_m|\mathcal{P}, \alpha, \epsilon, \delta)$ 

```

---

## Unknown progression stages

In practice, we do not have the progression stages of individual tumors. Fortunately, we can marginalize out the progression stages vector  $\sigma_{1:M}$  using the independence assumption over the samples given the pathways:

$$p(Y|\mathcal{P}, \alpha, \epsilon, \delta) = \sum_{\sigma_{1:M}} p(Y, \sigma_{1:M}|\alpha, \mathcal{P}, \epsilon, \delta) = \prod_{m=1}^M \left( \sum_{\sigma_m=1}^L p(Y_m, \sigma_m|\mathcal{P}, \alpha, \epsilon, \delta) \right) \quad (5)$$

In order to calculate  $p(Y_m, \sigma_m|\mathcal{P}, \alpha, \epsilon, \delta)$ , we can write it as

$$p(Y_m, \sigma_m|\mathcal{P}, \alpha, \epsilon, \delta) = p(\sigma_m|\alpha)p(Y_m|\mathcal{P}, \sigma_m, \epsilon, \delta), \quad (6)$$

where the first term is the prior belief on the stages being  $\sigma_m$  and the second term is given by (1). We consider a uniform prior on the progression stages  $\sigma_{1:M}$ , i.e.,  $\alpha = (1/L, \dots, 1/L)$ . However, an alternative prior can be chosen.

In the following subsection, we describe a systematic likelihood calculation scheme, which can prevent us from repetitive calculations while going over our  $M$  tumors in the data.

## Fast Likelihood Calculation

Given a progression model  $\mathcal{P} = (D_1, \dots, D_L)$ , and the data matrix  $Y$ , we form a matrix  $C$  of shape  $(M, L)$ , where  $C_{i,j}$  is the number of mutations of tumor  $i$  in driver pathway  $j$ . Denoting the size of our largest pathway by  $z = \max_{l \in [L]} |D_l|$ , we form two look-up tables in form of zero matrices  $\mathcal{A}$  and  $\mathcal{B}$  of shape  $(z, z)$ . We modify our likelihood calculation algorithm to check the lookup tables before any repetitive calculations. The modified procedure is provided in Algorithm S1.
