# Supplementary material for: Inferring tumor progression in large datasets
Source: PubMed Central journal article supplement (PMC7577444; doi:10.1371/journal.pcbi.1008183), 2020-10-09
Supplement: pcbi.1008183.s002.pdf [file pcbi.1008183.s002.pdf]

## Model selection details

The posterior probability of a model length  $L \in \mathcal{L}$  given the observation can be written as

$$p(L|Y) = \frac{p(Y|L)p(L)}{\sum_{L \in \mathcal{L}} p(Y|L)p(L)}.$$

Our uniform prior on the model length corresponds to setting  $p(L) = 1/|\mathcal{L}|$ , hence,  $p(L|Y) \propto p(Y|L)$ . Equation (3) of the paper can be simply derived as follows,

$$\mathbb{E}_{p(\mathcal{P}, \epsilon, \delta|Y, L)} \left[ \frac{1}{p(Y|\mathcal{P}, \epsilon, \delta, L)p(\epsilon, \delta)p(\mathcal{P}|L)} \right] = \int \frac{p(\mathcal{P}, \epsilon, \delta|Y, L)}{p(Y|\mathcal{P}, \epsilon, \delta, L)p(\epsilon, \delta)p(\mathcal{P}|L)} d\mathcal{P}d\epsilon d\delta = \frac{1}{p(Y|L)}$$

The MCMC estimate of the LHS in this equation will be

$$\mathbb{E}_{p(\mathcal{P}, \epsilon, \delta|Y, L)} \left[ \frac{1}{p(Y|\mathcal{P}, \epsilon, \delta, L)p(\epsilon, \delta)p(\mathcal{P}|L)} \right] \approx \frac{1}{I} \sum_{i=1}^I \frac{1}{p(Y|\mathcal{P}_i, \epsilon_i, \delta_i, L)p(\epsilon_i, \delta_i)p(\mathcal{P}_i|L)}.$$

One potential problem is in the computation of  $p(\mathcal{P}_i|L)$ , where we need to calculate the cardinality of the space of valid pathway progression models of length  $L$ :  $|\mathcal{X}(L)|$ . Although enumeration over  $\mathcal{X}(L)$  appears intractable, there is a closed-form formula for computing its cardinality,  $|\mathcal{X}(L)|$ . Given a set of  $N$  genes, a valid progression of length  $L$  consists of  $L$  non-empty driver pathways and a set of passenger genes. Let  $f_N(L)$  denote the number of valid ways to allocate  $N$  genes to  $L$  non-empty driver pathways and the set of passengers (which can remain empty). We can calculate  $f_N(L)$  using the recursive formula

$$f_N(L) = (L+1)^N - \sum_{i=1}^L \binom{L}{i} f_N(L-i).$$

Note that  $f_N(L)$  is the total number of possible assignments,  $(L+1)^N$ , minus the number of invalid assignments. We count the number of invalid assignments with  $i$  empty driver pathways separately. There exist  $\binom{L}{i}$  different choices for a set of  $i$  driver pathways to keep empty. For each case, we can have  $f_N(L-i)$  different valid assignment of genes to the remaining pathways, ensuring that none of the  $L-i$  remaining driver pathways are empty.
